# Supplementary material
Source: PubMed Central journal article supplement (PMC3434556)
Supplement: IAI.06319-11_zii999099745so2.pdf [file IAI.06319-11_zii999099745so2.pdf]

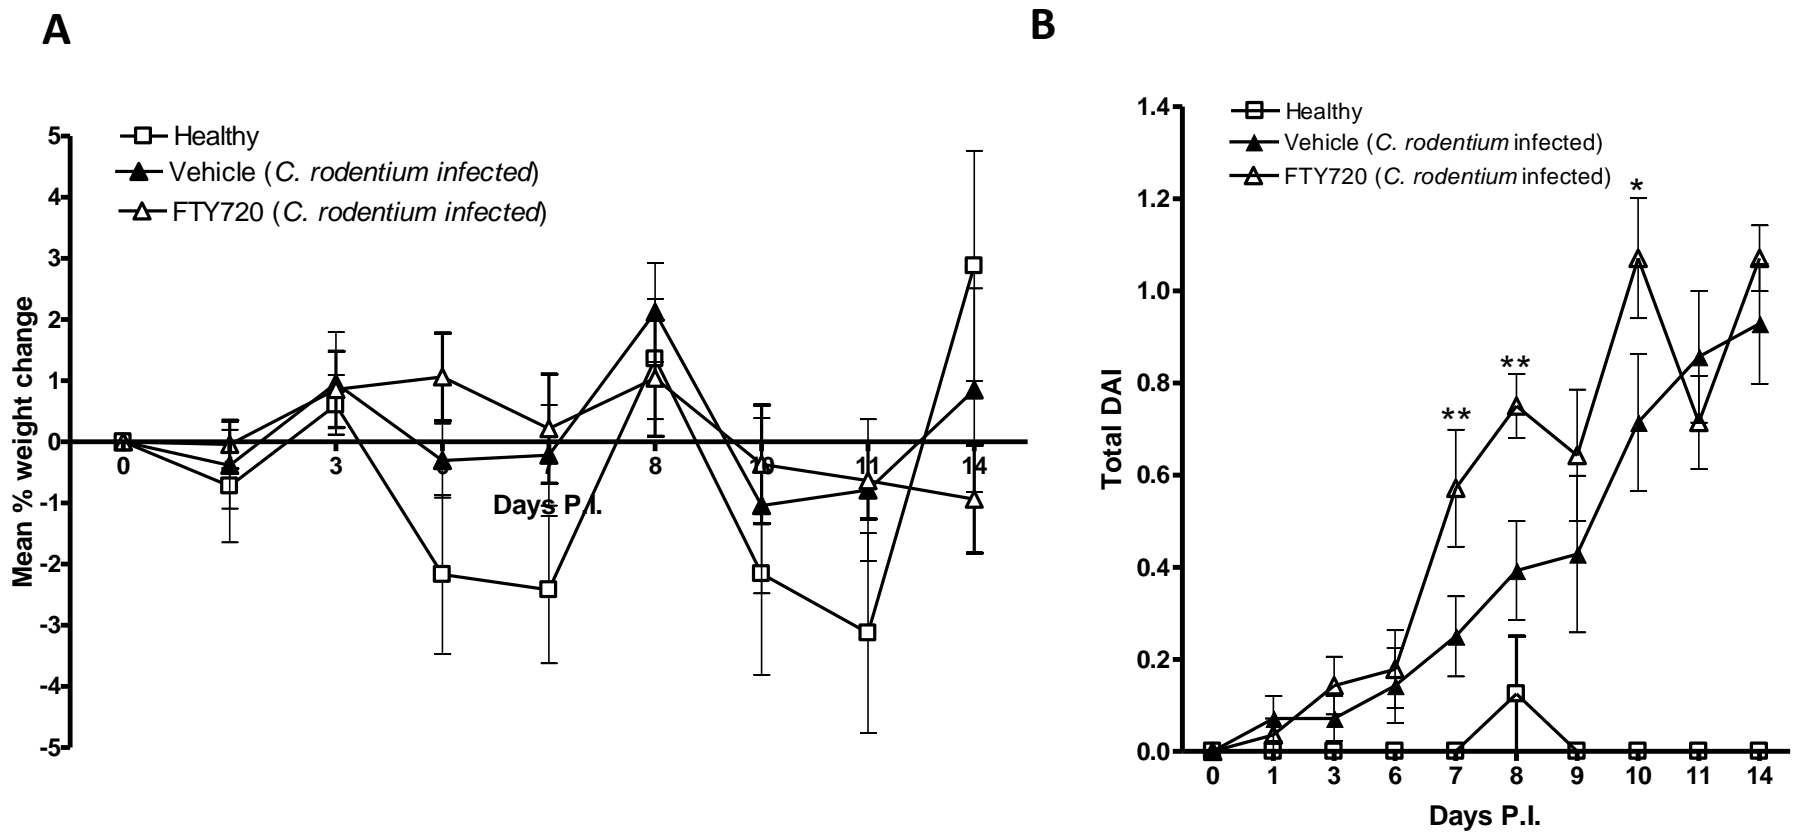

**Supplementary Figure 2. Clinical symptoms of inflammation**

(A) Mean % change in body weight. (B) Stool consistency and fur texture/ animal posture were used to generate a disease activity index (DAI) score. Data is expressed as the mean ± SEM of 7-14 individual animals per group. Significance at different time points was determined by one-way ANOVA followed by Bonferroni's multiple comparison test; \* P<0.05, \*\* P<0.001, \*\*\* P<0.001 vehicle versus FTY720.
