# Supplementary material
Source: PubMed Central journal article supplement (PMC3434556)

## Suppl. Fig. 1

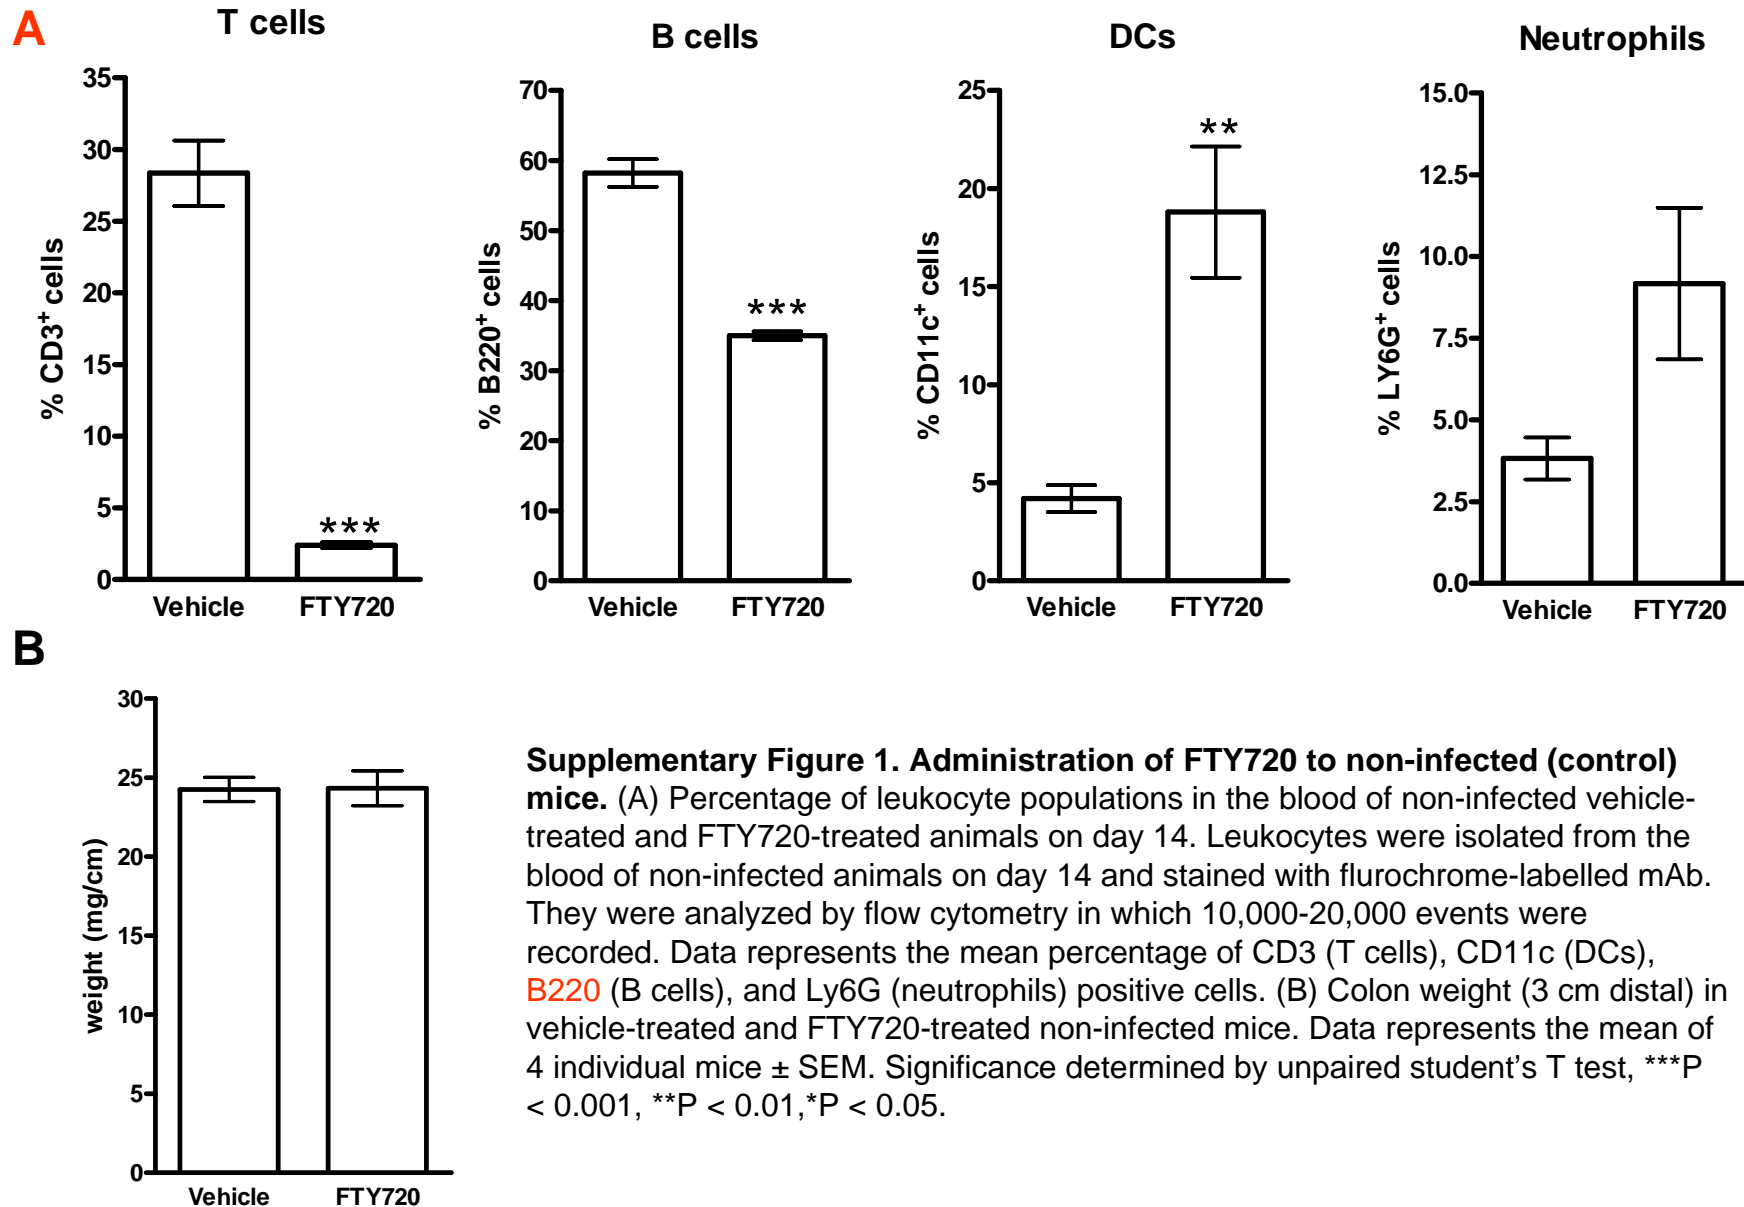

Supplement: IAI.06319-11_zii999099745so1.pdf [file IAI.06319-11_zii999099745so1.pdf]
